# Supplementary material for: Analysis of the distribution of assimilation products and the characteristics of transcriptomes in rice by submergence during the ripening stage
Source: BMC Genomics. 2019 Jan 8;20:18. doi: 10.1186/s12864-018-5320-7 (PMC6323827; doi:10.1186/s12864-018-5320-7)
Supplement: Supplementary file 8 — Table S6. The KEGG pathway enrichment analysis of the differentially expressed genes (DEGs) related to carbon fixation in photosynthetic organism metabolism. (XLSX 30 kb) [file 12864_2018_5320_MOESM8_ESM.xlsx]

## Sheet: seed
	KEGG info.				Log2FoldChange			Normalization						Annotation
Gene id	E-value	Identity	Gene id	Ecnumber	seed_treatment_vs_seed_control	stem_treatment_vs_stem_control	leaf_treatment_vs_leaf_control	seed_control	seed_treatment	stem_control	stem_treatment	leaf_control	leaf_treatment	RICEdesc	TAIR	TAIRsymbol	TAIRdesc	Pfam	Panther	KOG
LOC_Os05g09440.1	0	100	osa:4338007	1.1.1.40	3.25	-0.57	-0.92	287	2743	233	157	307	163	NADP-dependent malic enzyme, chloroplast precursor, putative, expressed	AT5G25880.1	ATNADP-ME3,NADP-ME3	NADP-malic enzyme 3	PF03949,PF00390	PTHR23406	KOG1257										osa:4326769 ME6, NADP-ME; NADP-dependent malic enzyme, chloroplastic; K00029 malate dehydrogenase (oxaloacetate-decarboxylating)(NADP+) [EC:1.1.1.40] (A)LOC_Os01g55540.1up0	100	osa:4325621	2.6.1.1	osa:4325621 aspartate aminotransferase, cytoplasmic; K14454 aspartate aminotransferase, cytoplasmic [EC:2.6.1.1] (A)LOC_Os01g55540.2up0	99.35	osa:4325621	2.6.1.1	osa:4325621 aspartate aminotransferase, cytoplasmic; K14454 aspartate aminotransferase, cytoplasmic [EC:2.6.1.1] (A)LOC_Os01g62420.2up1.00E-56	100	osa:4327400	5.3.1.1	osa:4327400 triosephosphate isomerase, cytosolic-like; K01803 triosephosphate isomerase (TIM) [EC:5.3.1.1] (A)LOC_Os01g62420.3up8.00E-116	100	osa:4327400	5.3.1.1	osa:4327400 triosephosphate isomerase, cytosolic-like; K01803 triosephosphate isomerase (TIM) [EC:5.3.1.1] (A)LOC_Os01g62420.4up5.00E-155	100	osa:4327400	5.3.1.1
LOC_Os01g09320.1	0	100	osa:4326769	1.1.1.40	1.75	-0.27	-0.41	2161	7273	3757	3120	2961	2231	NADP-dependent malic enzyme, chloroplast precursor, putative, expressed	AT1G79750.1	ATNADP-ME4,NADP-ME4	NADP-malic enzyme 4	PF00390,PF03949	PTHR23406	KOG1257
LOC_Os01g54030.1	0	100	osa:4326552	1.1.1.40	-1.28	-0.82	-0.41	2218	911	45	25	14	11	NADP-dependent malic enzyme, putative, expressed	AT5G25880.1	ATNADP-ME3,NADP-ME3	NADP-malic enzyme 3	PF03949,PF00390	PTHR23406:SF2,PTHR23406	KOG1257
LOC_Os02g38920.1	0	95.91	osa:4329892	1.2.1.12	1.75	2.49	2.53	14339	48354	2185	12285	1393	8054	glyceraldehyde-3-phosphate dehydrogenase, putative, expressed	AT3G04120.1	GAPC,GAPC-1,GAPC1	glyceraldehyde-3-phosphate dehydrogenase C subunit 1	PF02800,PF00044	PTHR10836	KOG0657
LOC_Os04g19740.1	0	100	osa:4335330	2.2.1.1	-1.09	-0.25	-0.32	1128	530	675	567	288	231	transketolase, chloroplast precursor, putative, expressed	AT2G45290.1		Transketolase	PF02779,PF02780,PF00456	PTHR11624:SF1,PTHR11624	KOG0523
LOC_Os06g04270.1	0	100	osa:4340025	2.2.1.1	-1.37	0.65	-0.62	1674	646	7377	11564	12945	8440	transketolase, chloroplast precursor, putative, expressed	AT2G45290.1		Transketolase	PF02780,PF02779,PF00456	PTHR11624,PTHR11624:SF1	KOG0523
LOC_Os06g35540.1	0	100	osa:4341252	2.6.1.1	1.47	1.23	1.19	1692	4694	394	925	432	989	aminotransferase, classes I and II, domain containing protein, expressed	AT2G30970.1	ASP1	aspartate aminotransferase 1	PF00155	PTHR11879	KOG1411
LOC_Os01g55540.1	0	100	osa:4325621	2.6.1.1	1.21	2.03	2.52	11618	26919	1844	7508	1084	6209	aminotransferase, classes I and II, domain containing protein, expressed	AT5G11520.1	ASP3,YLS4	aspartate aminotransferase 3	PF00155	PTHR11879	KOG1411
LOC_Os01g55540.2	0	99.35	osa:4325621	2.6.1.1	1.21	2.03	2.52	11571	26813	1838	7494	1082	6189	aminotransferase, classes I and II, domain containing protein, expressed	AT5G11520.1	ASP3,YLS4	aspartate aminotransferase 3	PF00155	PTHR11879	KOG1411
LOC_Os02g07260.3	0	100	osa:4328435	2.7.2.3	2.2	1.65	0.81	8136	37329	3078	9682	2888	5069	phosphoglycerate kinase protein, putative, expressed	AT1G79550.1	PGK	phosphoglycerate kinase	PF00162	PTHR11406	KOG1367
LOC_Os02g07260.1	0	100	osa:4328435	2.7.2.3	2.2	1.65	0.82	8340	38360	3172	9973	2981	5245	phosphoglycerate kinase protein, putative, expressed	AT1G79550.1	PGK	phosphoglycerate kinase	PF00162	PTHR11406	KOG1367
LOC_Os02g07260.2	0	100	osa:4328435	2.7.2.3	2.2	1.65	0.81	8290	38136	3158	9913	2970	5203	phosphoglycerate kinase protein, putative, expressed	AT1G79550.1	PGK	phosphoglycerate kinase	PF00162	PTHR11406	KOG1367
LOC_Os03g31750.2	0	99.32	osa:4333181	2.7.9.1	3.75	7.56	7.3	3984	53424	107	20239	147	23159	pyruvate, phosphate dikinase, chloroplast precursor, putative, expressed	AT4G15530.5	PPDK	pyruvate orthophosphate dikinase	PF02896,PF01326,PF00391	PTHR22931,PTHR22931:SF9
LOC_Os03g31750.3	0	99.44	osa:4333181	2.7.9.1	3.34	6.57	6.16	5918	59863	235	22315	367	26187	pyruvate, phosphate dikinase, chloroplast precursor, putative, expressed	AT4G15530.5	PPDK	pyruvate orthophosphate dikinase	PF01326,PF02896,PF00391	PTHR22931,PTHR22931:SF9
LOC_Os03g31750.1	0	100	osa:4333181	2.7.9.1	3.27	6.37	5.98	6267	60427	271	22360	416	26234	pyruvate, phosphate dikinase, chloroplast precursor, putative, expressed	AT4G15530.5	PPDK	pyruvate orthophosphate dikinase	PF00391,PF02896,PF01326	PTHR22931:SF9,PTHR22931
LOC_Os12g17600.1	5e-111	100	osa:4351966	4.1.1.39	-3.15	-0.71	-1.72	1146	129	15668	9575	21696	6606	ribulose bisphosphate carboxylase small chain, chloroplast precursor, putative, expressed	AT1G67090.1	RBCS1A	ribulose bisphosphate carboxylase small chain 1A	PF00101,PF12338
LOC_Os12g19381.1	6e-93	97.06	osa:4352014	4.1.1.39	-3.33	-0.51	-1.29	1610	161	19772	13854	24314	9914	ribulose bisphosphate carboxylase small chain, chloroplast precursor, putative, expressed	AT1G67090.1	RBCS1A	ribulose bisphosphate carboxylase small chain 1A	PF00101,PF12338
LOC_Os10g13700.2	0	100	osa:4348268	4.1.1.49	7.28	5.84	6.45	221	34272	148	8463	118	10343	phosphoenolpyruvate carboxykinase, putative, expressed	AT4G37870.1	PCK1,PEPCK	phosphoenolpyruvate carboxykinase 1	PF01293	PTHR11699,PTHR11699:SF22
LOC_Os10g13694.2	5e-30	100	osa:4348268	4.1.1.49	2.93	0.7	1.03	247	1883	298	485	288	588
LOC_Os10g13694.1	1e-29	100	osa:4348268	4.1.1.49	2.6	0.43	0.87	695	4201	933	1261	808	1481
LOC_Os03g15050.2	0	100	osa:4332293	4.1.1.49	-1.04	-0.66	1.5	1994	969	3505	2222	4131	11700	phosphoenolpyruvate carboxykinase, putative, expressed	AT4G37870.1	PCK1,PEPCK	phosphoenolpyruvate carboxykinase 1	PF01293	PTHR11699,PTHR11699:SF22
LOC_Os03g15050.1	0	95.65	osa:4332293	4.1.1.49	-1.04	-0.68	1.5	1904	926	3366	2096	3886	10989	phosphoenolpyruvate carboxykinase, putative, expressed	AT4G37870.1	PCK1,PEPCK	phosphoenolpyruvate carboxykinase 1	PF01293	PTHR11699,PTHR11699:SF22
LOC_Os03g15050.4	0	98.66	osa:4332293	4.1.1.49	-1.05	-0.57	1.52	1502	724	2593	1742	3353	9594	phosphoenolpyruvate carboxykinase, putative, expressed	AT4G37870.1	PCK1,PEPCK	phosphoenolpyruvate carboxykinase 1	PF01293
LOC_Os01g67860.1	0	100	osa:4325027	4.1.2.13	1.65	1.48	1.51	18950	59610	4345	12135	2173	6199	fructose-bisphospate aldolase isozyme, putative, expressed	AT2G36460.1		Aldolase superfamily protein	PF00274	PTHR11627	KOG1557
LOC_Os10g08022.1	0	94.69	osa:4338737	4.1.2.13	1.63	1.45	1.2	5460	16862	1556	4258	666	1534	fructose-bisphospate aldolase isozyme, putative, expressed	AT2G36460.1		Aldolase superfamily protein	PF00274	PTHR11627	KOG1557
LOC_Os05g33380.1	0	100	osa:4338737	4.1.2.13	1.59	1.37	1.12	10436	31326	3180	8203	1297	2827	fructose-bisphospate aldolase isozyme, putative, expressed	AT2G36460.1		Aldolase superfamily protein	PF00274	PTHR11627	KOG1557
LOC_Os01g05490.1	1e-177	100	osa:4325211	5.3.1.1	1.67	1.19	0.37	4107	13077	2947	6705	4051	5229	triosephosphate isomerase, cytosolic, putative, expressed	AT3G55440.1	ATCTIMC,CYTOTPI,TPI	triosephosphate isomerase	PF00121	PTHR21139	KOG1643
LOC_Os01g05490.2	2e-168	85.47	osa:4325211	5.3.1.1	1.67	1.19	0.35	3854	12226	2757	6269	3831	4895	triosephosphate isomerase, cytosolic, putative, expressed	AT3G55440.1	ATCTIMC,CYTOTPI,TPI	triosephosphate isomerase	PF00121	PTHR21139	KOG1643
LOC_Os01g62420.3	8e-116	100	osa:4327400	5.3.1.1	1.63	-0.08	-1.29	902	2788	140	132	162	66	triosephosphate isomerase, cytosolic, putative, expressed	AT3G55440.1	ATCTIMC,CYTOTPI,TPI	triosephosphate isomerase	PF00121	PTHR21139	KOG1643
LOC_Os01g62420.2	1e-56	100	osa:4327400	5.3.1.1	1.58	-0.42	-1.27	684	2045	130	98	145	60	triosephosphate isomerase, cytosolic, putative, expressed	AT3G55440.1	ATCTIMC,CYTOTPI,TPI	triosephosphate isomerase	PF00121	PTHR21139
LOC_Os01g62420.1	2e-167	100	osa:4327400	5.3.1.1	1.51	-0.25	-1.35	1417	4034	235	197	283	111	triosephosphate isomerase, cytosolic, putative, expressed	AT3G55440.1	ATCTIMC,CYTOTPI,TPI	triosephosphate isomerase	PF00121	PTHR21139	KOG1643
LOC_Os01g62420.4	5e-155	100	osa:4327400	5.3.1.1	1.49	-0.25	-1.39	1406	3952	229	192	279	107	triosephosphate isomerase, cytosolic, putative, expressed	AT3G55440.1	ATCTIMC,CYTOTPI,TPI	triosephosphate isomerase	PF00121	PTHR21139
[truncated: 70 more columns]

## Sheet: stem
	KEGG info.				Log2FoldChange			Normalization						Annotation
Gene id	E-value	Identity	Gene id	Ecnumber	seed_treatment_vs_seed_control	stem_treatment_vs_stem_control	leaf_treatment_vs_leaf_control	seed_control	seed_treatment	stem_control	stem_treatment	leaf_control	leaf_treatment	RICEdesc	TAIR	TAIRsymbol	TAIRdesc	Pfam	Panther	KOG
LOC_Os03g56280.1	0	100	osa:4334274	1.1.1.37	-1.83	-1.47	-2.22	650	183	4300	1555	14169	3035	lactate/malate dehydrogenase, putative, expressed	AT5G09660.1	PMDH2	peroxisomal NAD-malate dehydrogenase 2	PF02866,PF00056	PTHR11540:SF1,PTHR11540	KOG1494
LOC_Os10g35960.1	0	100	osa:4349051	1.1.1.39	-2.54	-2.06	-1.45	625	108	2116	509	1717	628	NAD-dependent malic enzyme, mitochondrial precursor, putative, expressed	AT4G00570.1	NAD-ME2	NAD-dependent malic enzyme 2	PF00390,PF03949	PTHR23406:SF2,PTHR23406	KOG1257
LOC_Os10g35960.2	0	100	osa:4349051	1.1.1.39	-2.41	-2.09	-1.52	534	100	1826	430	1461	509	NAD-dependent malic enzyme, mitochondrial precursor, putative, expressed	AT4G00570.1	NAD-ME2	NAD-dependent malic enzyme 2	PF00390,PF03949	PTHR23406:SF2,PTHR23406	KOG1257
LOC_Os02g38920.1	0	95.91	osa:4329892	1.2.1.12	1.75	2.49	2.53	14339	48354	2185	12285	1393	8054	glyceraldehyde-3-phosphate dehydrogenase, putative, expressed	AT3G04120.1	GAPC,GAPC-1,GAPC1	glyceraldehyde-3-phosphate dehydrogenase C subunit 1	PF02800,PF00044	PTHR10836	KOG0657
LOC_Os01g55540.1	0	100	osa:4325621	2.6.1.1	1.21	2.03	2.52	11618	26919	1844	7508	1084	6209	aminotransferase, classes I and II, domain containing protein, expressed	AT5G11520.1	ASP3,YLS4	aspartate aminotransferase 3	PF00155	PTHR11879	KOG1411
LOC_Os01g55540.2	0	99.35	osa:4325621	2.6.1.1	1.21	2.03	2.52	11571	26813	1838	7494	1082	6189	aminotransferase, classes I and II, domain containing protein, expressed	AT5G11520.1	ASP3,YLS4	aspartate aminotransferase 3	PF00155	PTHR11879	KOG1411
LOC_Os02g14110.1	0	98.52	osa:4328828	2.6.1.1	0.13	1.28	1.69	4354	4767	446	1080	275	888	aminotransferase, classes I and II, domain containing protein, expressed	AT2G30970.1	ASP1	aspartate aminotransferase 1	PF00155	PTHR11879	KOG1411
LOC_Os02g07260.3	0	100	osa:4328435	2.7.2.3	2.2	1.65	0.81	8136	37329	3078	9682	2888	5069	phosphoglycerate kinase protein, putative, expressed	AT1G79550.1	PGK	phosphoglycerate kinase	PF00162	PTHR11406	KOG1367
LOC_Os02g07260.1	0	100	osa:4328435	2.7.2.3	2.2	1.65	0.82	8340	38360	3172	9973	2981	5245	phosphoglycerate kinase protein, putative, expressed	AT1G79550.1	PGK	phosphoglycerate kinase	PF00162	PTHR11406	KOG1367
LOC_Os02g07260.2	0	100	osa:4328435	2.7.2.3	2.2	1.65	0.81	8290	38136	3158	9913	2970	5203	phosphoglycerate kinase protein, putative, expressed	AT1G79550.1	PGK	phosphoglycerate kinase	PF00162	PTHR11406	KOG1367
LOC_Os06g45710.1	0	100	osa:4341792	2.7.2.3	0.78	1.32	2.02	4277	7340	815	2037	334	1356	phosphoglycerate kinase protein, putative, expressed	AT1G79550.1	PGK	phosphoglycerate kinase	PF00162	PTHR11406	KOG1367
LOC_Os03g31750.2	0	99.32	osa:4333181	2.7.9.1	3.75	7.56	7.3	3984	53424	107	20239	147	23159	pyruvate, phosphate dikinase, chloroplast precursor, putative, expressed	AT4G15530.5	PPDK	pyruvate orthophosphate dikinase	PF02896,PF01326,PF00391	PTHR22931,PTHR22931:SF9
LOC_Os03g31750.3	0	99.44	osa:4333181	2.7.9.1	3.34	6.57	6.16	5918	59863	235	22315	367	26187	pyruvate, phosphate dikinase, chloroplast precursor, putative, expressed	AT4G15530.5	PPDK	pyruvate orthophosphate dikinase	PF01326,PF02896,PF00391	PTHR22931,PTHR22931:SF9
LOC_Os03g31750.1	0	100	osa:4333181	2.7.9.1	3.27	6.37	5.98	6267	60427	271	22360	416	26234	pyruvate, phosphate dikinase, chloroplast precursor, putative, expressed	AT4G15530.5	PPDK	pyruvate orthophosphate dikinase	PF00391,PF02896,PF01326	PTHR22931:SF9,PTHR22931
LOC_Os05g33570.2	0	99.88	osa:4338750	2.7.9.1	-0.04	-1.53	-2.43	71464	69523	7443	2573	11474	2128	pyruvate, phosphate dikinase, chloroplast precursor, putative, expressed	AT4G15530.5	PPDK	pyruvate orthophosphate dikinase	PF02896,PF01326,PF00391	PTHR22931:SF9,PTHR22931
LOC_Os05g33570.1	0	100	osa:4338750	2.7.9.1	-0.03	-1.55	-2.46	70150	68547	7455	2553	11854	2158	pyruvate, phosphate dikinase, chloroplast precursor, putative, expressed	AT4G15530.5	PPDK	pyruvate orthophosphate dikinase	PF02896,PF01326,PF00391	PTHR22931:SF9,PTHR22931
LOC_Os08g27840.1	0	100	osa:4345387	4.1.1.31	-3.21	-1.27	-1.5	684	74	2439	1009	4132	1458	phosphoenolpyruvate carboxylase, putative, expressed	AT1G53310.1	ATPEPC1,ATPPC1,PEPC1,PPC1	phosphoenolpyruvate carboxylase 1	PF00311
LOC_Os08g27840.2	0	100	osa:4345387	4.1.1.31	-3.42	-1.28	-1.54	640	60	2217	915	3804	1308	phosphoenolpyruvate carboxylase, putative, expressed	AT1G53310.1	ATPEPC1,ATPPC1,PEPC1,PPC1	phosphoenolpyruvate carboxylase 1	PF00311
LOC_Os09g14670.1	0	100	osa:4346699	4.1.1.31	-1.97	-1.69	-1.18	429	109	2151	664	1051	465	phosphoenolpyruvate carboxylase, putative, expressed	AT1G53310.1	ATPEPC1,ATPPC1,PEPC1,PPC1	phosphoenolpyruvate carboxylase 1	PF00311
LOC_Os02g05830.1	6e-140	100	osa:4328326	4.1.1.39	-0.04	3.07	2.3	445	432	544	4567	46	224	ribulose bisphosphate carboxylase small chain, chloroplast precursor, putative, expressed	AT1G67090.1	RBCS1A	ribulose bisphosphate carboxylase small chain 1A	PF00101
LOC_Os02g05830.2	2e-76	96.1	osa:4328326	4.1.1.39	0.02	3.06	2.15	418	425	515	4302	49	219	ribulose bisphosphate carboxylase small chain, chloroplast precursor, putative, expressed	AT1G67090.2	RBCS1A	ribulose bisphosphate carboxylase small chain 1A	PF00101
LOC_Os10g13700.2	0	100	osa:4348268	4.1.1.49	7.28	5.84	6.45	221	34272	148	8463	118	10343	phosphoenolpyruvate carboxykinase, putative, expressed	AT4G37870.1	PCK1,PEPCK	phosphoenolpyruvate carboxykinase 1	PF01293	PTHR11699,PTHR11699:SF22
LOC_Os01g67860.1	0	100	osa:4325027	4.1.2.13	1.65	1.48	1.51	18950	59610	4345	12135	2173	6199	fructose-bisphospate aldolase isozyme, putative, expressed	AT2G36460.1		Aldolase superfamily protein	PF00274	PTHR11627	KOG1557
LOC_Os10g08022.1	0	94.69	osa:4338737	4.1.2.13	1.63	1.45	1.2	5460	16862	1556	4258	666	1534	fructose-bisphospate aldolase isozyme, putative, expressed	AT2G36460.1		Aldolase superfamily protein	PF00274	PTHR11627	KOG1557
LOC_Os05g33380.1	0	100	osa:4338737	4.1.2.13	1.59	1.37	1.12	10436	31326	3180	8203	1297	2827	fructose-bisphospate aldolase isozyme, putative, expressed	AT2G36460.1		Aldolase superfamily protein	PF00274	PTHR11627	KOG1557
LOC_Os01g05490.1	1e-177	100	osa:4325211	5.3.1.1	1.67	1.19	0.37	4107	13077	2947	6705	4051	5229	triosephosphate isomerase, cytosolic, putative, expressed	AT3G55440.1	ATCTIMC,CYTOTPI,TPI	triosephosphate isomerase	PF00121	PTHR21139	KOG1643
LOC_Os01g05490.2	2e-168	85.47	osa:4325211	5.3.1.1	1.67	1.19	0.35	3854	12226	2757	6269	3831	4895	triosephosphate isomerase, cytosolic, putative, expressed	AT3G55440.1	ATCTIMC,CYTOTPI,TPI	triosephosphate isomerase	PF00121	PTHR21139	KOG1643

## Sheet: leaf
	KEGG info.				Log2FoldChange			Normalization						Annotation
Gene id	E-value	Identity	Gene id	Ecnumber	seed_treatment_vs_seed_control	stem_treatment_vs_stem_control	leaf_treatment_vs_leaf_control	seed_control	seed_treatment	stem_control	stem_treatment	leaf_control	leaf_treatment	RICEdesc	TAIR	TAIRsymbol	TAIRdesc	Pfam	Panther	KOG
LOC_Os05g49880.1	0	100	osa:4339682	1.1.1.37	-0.46	-0.16	-1.81	1791	1299	932	835	1970	564	lactate/malate dehydrogenase, putative, expressed	AT1G53240.1	mMDH1	Lactate/malate dehydrogenase family protein	PF02866,PF00056	PTHR11540:SF1,PTHR11540	KOG1494
LOC_Os05g49880.2	1e-161	98.5	osa:4339682	1.1.1.37	-0.47	-0.16	-1.81	1742	1259	909	814	1911	544	lactate/malate dehydrogenase, putative, expressed	AT1G53240.1	mMDH1	Lactate/malate dehydrogenase family protein	PF00056,PF02866	PTHR11540:SF1,PTHR11540
LOC_Os03g56280.1	0	100	osa:4334274	1.1.1.37	-1.83	-1.47	-2.22	650	183	4300	1555	14169	3035	lactate/malate dehydrogenase, putative, expressed	AT5G09660.1	PMDH2	peroxisomal NAD-malate dehydrogenase 2	PF02866,PF00056	PTHR11540:SF1,PTHR11540	KOG1494
LOC_Os08g33720.1	0	100	osa:4345657	1.1.1.37	-0.3	0.63	-4.03	813	659	568	881	1370	84	lactate/malate dehydrogenase, putative, expressed	AT3G47520.1	MDH	malate dehydrogenase	PF00056,PF02866	PTHR11540:SF1,PTHR11540	KOG1494
LOC_Os10g35960.1	0	100	osa:4349051	1.1.1.39	-2.54	-2.06	-1.45	625	108	2116	509	1717	628	NAD-dependent malic enzyme, mitochondrial precursor, putative, expressed	AT4G00570.1	NAD-ME2	NAD-dependent malic enzyme 2	PF00390,PF03949	PTHR23406:SF2,PTHR23406	KOG1257
LOC_Os10g35960.2	0	100	osa:4349051	1.1.1.39	-2.41	-2.09	-1.52	534	100	1826	430	1461	509	NAD-dependent malic enzyme, mitochondrial precursor, putative, expressed	AT4G00570.1	NAD-ME2	NAD-dependent malic enzyme 2	PF00390,PF03949	PTHR23406:SF2,PTHR23406	KOG1257
LOC_Os08g44810.1	0	100	osa:4346332	1.1.1.82	-0.76	-0.33	-1.77	571	338	1724	1370	3978	1163	lactate/malate dehydrogenase, putative, expressed	AT5G58330.2		lactate/malate dehydrogenase family protein	PF02866,PF00056	PTHR23382	KOG1496
LOC_Os02g38920.1	0	95.91	osa:4329892	1.2.1.12	1.75	2.49	2.53	14339	48354	2185	12285	1393	8054	glyceraldehyde-3-phosphate dehydrogenase, putative, expressed	AT3G04120.1	GAPC,GAPC-1,GAPC1	glyceraldehyde-3-phosphate dehydrogenase C subunit 1	PF02800,PF00044	PTHR10836	KOG0657
LOC_Os04g38600.4	2e-47	98.7	osa:4336044	1.2.1.13	-1.71	0.37	-2.09	402	123	1736	2250	6632	1558	glyceraldehyde-3-phosphate dehydrogenase, putative, expressed	AT1G12900.2	GAPA-2	glyceraldehyde 3-phosphate dehydrogenase A subunit 2	PF02800	PTHR10836
LOC_Os03g03720.1	0	100	osa:4331495	1.2.1.13	-1.71	-0.02	-2.13	745	228	6699	6586	20914	4782	glyceraldehyde-3-phosphate dehydrogenase, putative, expressed	AT1G42970.1	GAPB	glyceraldehyde-3-phosphate dehydrogenase B subunit	PF00044,PF02672,PF02800	PTHR10836	KOG0657
LOC_Os03g03720.2	0	94.16	osa:4331495	1.2.1.13	-1.72	-0.03	-2.13	737	223	6579	6453	20556	4682	glyceraldehyde-3-phosphate dehydrogenase, putative, expressed	AT1G42970.1	GAPB	glyceraldehyde-3-phosphate dehydrogenase B subunit	PF00044,PF02672,PF02800	PTHR10836	KOG0657
LOC_Os04g38600.2	0	99.26	osa:4336044	1.2.1.13	-1.42	0.33	-2.22	832	311	6023	7576	22579	4831	glyceraldehyde-3-phosphate dehydrogenase, putative, expressed	AT1G12900.1	GAPA-2	glyceraldehyde 3-phosphate dehydrogenase A subunit 2	PF00044,PF02800	PTHR10836	KOG0657
LOC_Os04g38600.3	0	100	osa:4336044	1.2.1.13	-1.42	0.33	-2.23	832	311	6038	7593	22622	4839	glyceraldehyde-3-phosphate dehydrogenase, putative, expressed	AT1G12900.1	GAPA-2	glyceraldehyde 3-phosphate dehydrogenase A subunit 2	PF00044,PF02800	PTHR10836	KOG0657
LOC_Os04g38600.1	0	98.29	osa:4336044	1.2.1.13	-1.42	0.34	-2.23	822	308	5904	7458	22069	4716	glyceraldehyde-3-phosphate dehydrogenase, putative, expressed	AT1G12900.1	GAPA-2	glyceraldehyde 3-phosphate dehydrogenase A subunit 2	PF00044,PF02800	PTHR10836	KOG0657
LOC_Os01g55540.1	0	100	osa:4325621	2.6.1.1	1.21	2.03	2.52	11618	26919	1844	7508	1084	6209	aminotransferase, classes I and II, domain containing protein, expressed	AT5G11520.1	ASP3,YLS4	aspartate aminotransferase 3	PF00155	PTHR11879	KOG1411
LOC_Os01g55540.2	0	99.35	osa:4325621	2.6.1.1	1.21	2.03	2.52	11571	26813	1838	7494	1082	6189	aminotransferase, classes I and II, domain containing protein, expressed	AT5G11520.1	ASP3,YLS4	aspartate aminotransferase 3	PF00155	PTHR11879	KOG1411
LOC_Os02g47020.1	0	100	osa:4330413	2.7.1.19	-1.13	-0.4	-1.15	554	252	7385	5578	25128	11344	phosphoribulokinase/Uridine kinase family protein, expressed	AT1G32060.1	PRK	phosphoribulokinase	PF00485	PTHR10285,PTHR10285:SF29	KOG4203
LOC_Os06g45710.1	0	100	osa:4341792	2.7.2.3	0.78	1.32	2.02	4277	7340	815	2037	334	1356	phosphoglycerate kinase protein, putative, expressed	AT1G79550.1	PGK	phosphoglycerate kinase	PF00162	PTHR11406	KOG1367
LOC_Os05g41640.2	0	79.7	osa:4341792	2.7.2.3	-1.54	0.89	-1.41	729	250	3236	6017	8193	3082	phosphoglycerate kinase protein, putative, expressed	AT1G56190.1		Phosphoglycerate kinase family protein	PF00162	PTHR11406	KOG1367
LOC_Os05g41640.3	0	79.7	osa:4341792	2.7.2.3	-1.52	0.89	-1.42	677	236	3092	5723	7876	2934	phosphoglycerate kinase protein, putative, expressed	AT1G56190.1		Phosphoglycerate kinase family protein	PF00162	PTHR11406	KOG1367
LOC_Os05g41640.1	0	79.7	osa:4341792	2.7.2.3	-1.52	0.89	-1.42	686	240	3131	5804	7976	2972	phosphoglycerate kinase protein, putative, expressed	AT1G56190.1		Phosphoglycerate kinase family protein	PF00162	PTHR11406	KOG1367
LOC_Os03g31750.2	0	99.32	osa:4333181	2.7.9.1	3.75	7.56	7.3	3984	53424	107	20239	147	23159	pyruvate, phosphate dikinase, chloroplast precursor, putative, expressed	AT4G15530.5	PPDK	pyruvate orthophosphate dikinase	PF02896,PF01326,PF00391	PTHR22931,PTHR22931:SF9
LOC_Os03g31750.3	0	99.44	osa:4333181	2.7.9.1	3.34	6.57	6.16	5918	59863	235	22315	367	26187	pyruvate, phosphate dikinase, chloroplast precursor, putative, expressed	AT4G15530.5	PPDK	pyruvate orthophosphate dikinase	PF01326,PF02896,PF00391	PTHR22931,PTHR22931:SF9
LOC_Os03g31750.1	0	100	osa:4333181	2.7.9.1	3.27	6.37	5.98	6267	60427	271	22360	416	26234	pyruvate, phosphate dikinase, chloroplast precursor, putative, expressed	AT4G15530.5	PPDK	pyruvate orthophosphate dikinase	PF00391,PF02896,PF01326	PTHR22931:SF9,PTHR22931
LOC_Os05g33570.2	0	99.88	osa:4338750	2.7.9.1	-0.04	-1.53	-2.43	71464	69523	7443	2573	11474	2128	pyruvate, phosphate dikinase, chloroplast precursor, putative, expressed	AT4G15530.5	PPDK	pyruvate orthophosphate dikinase	PF02896,PF01326,PF00391	PTHR22931:SF9,PTHR22931
LOC_Os05g33570.1	0	100	osa:4338750	2.7.9.1	-0.03	-1.55	-2.46	70150	68547	7455	2553	11854	2158	pyruvate, phosphate dikinase, chloroplast precursor, putative, expressed	AT4G15530.5	PPDK	pyruvate orthophosphate dikinase	PF02896,PF01326,PF00391	PTHR22931:SF9,PTHR22931
LOC_Os01g64660.4	0	88.27	osa:4325071	3.1.3.11	-1.59	0.34	-1.26	126	42	1486	1875	5544	2310	fructose-1,6-bisphosphatase, putative, expressed	AT1G43670.1		Inositol monophosphatase family protein	PF00316	PTHR11556,PTHR11556:SF8
LOC_Os01g64660.1	0	89.97	osa:4325071	3.1.3.11	-1.53	0.35	-1.26	122	42	1461	1866	5494	2286	fructose-1,6-bisphosphatase, putative, expressed	AT1G43670.1		Inositol monophosphatase family protein	PF00316	PTHR11556,PTHR11556:SF8	KOG1458
LOC_Os01g64660.2	0	100	osa:4325071	3.1.3.11	-1.62	0.35	-1.27	133	43	1575	2013	5973	2470	fructose-1,6-bisphosphatase, putative, expressed	AT1G43670.1		Inositol monophosphatase family protein	PF00316	PTHR11556,PTHR11556:SF8	KOG1458
LOC_Os01g64660.3	0	99.65	osa:4325071	3.1.3.11	-1.98	0.33	-1.28	120	30	1470	1846	5613	2318	fructose-1,6-bisphosphatase, putative, expressed	AT1G43670.1		Inositol monophosphatase family protein	PF00316	PTHR11556:SF8,PTHR11556	KOG1458
LOC_Os03g16050.1	0	100	osa:4332364	3.1.3.11	-0.25	-0.26	-1.78	192	162	1805	1512	7381	2149	fructose-1,6-bisphosphatase, putative, expressed	AT3G54050.1	HCEF1	high cyclic electron flow 1	PF00316	PTHR11556:SF7,PTHR11556	KOG1458
LOC_Os04g16680.1	0	100	osa:4335227	3.1.3.37	-1.86	-0.09	-1.5	576	158	4754	4459	17853	6324	fructose-1,6-bisphosphatase, putative, expressed	AT3G55800.1	SBPASE	sedoheptulose-bisphosphatase	PF00316	PTHR11556,PTHR11556:SF2	KOG1458
LOC_Os01g11054.3	0	100	osa:4325531	4.1.1.31	0.76	0.02	-1.07	169	286	753	764	1649	783	phosphoenolpyruvate carboxylase, putative, expressed	AT1G53310.1	ATPEPC1,ATPPC1,PEPC1,PPC1	phosphoenolpyruvate carboxylase 1	PF00311
LOC_Os01g11054.4	0	98.78	osa:4325531	4.1.1.31	0.67	0.05	-1.1	158	251	668	689	1514	704	phosphoenolpyruvate carboxylase, putative, expressed	AT1G53310.1	ATPEPC1,ATPPC1,PEPC1,PPC1	phosphoenolpyruvate carboxylase 1	PF00311
LOC_Os09g14670.1	0	100	osa:4346699	4.1.1.31	-1.97	-1.69	-1.18	429	109	2151	664	1051	465	phosphoenolpyruvate carboxylase, putative, expressed	AT1G53310.1	ATPEPC1,ATPPC1,PEPC1,PPC1	phosphoenolpyruvate carboxylase 1	PF00311
LOC_Os01g11054.1	0	100	osa:4325531	4.1.1.31	0.56	-0.27	-1.3	207	304	1245	1029	2808	1142	phosphoenolpyruvate carboxylase, putative, expressed	AT3G14940.1	ATPPC3,PPC3	phosphoenolpyruvate carboxylase 3	PF00311
LOC_Os08g27840.1	0	100	osa:4345387	4.1.1.31	-3.21	-1.27	-1.5	684	74	2439	1009	4132	1458	phosphoenolpyruvate carboxylase, putative, expressed	AT1G53310.1	ATPEPC1,ATPPC1,PEPC1,PPC1	phosphoenolpyruvate carboxylase 1	PF00311
LOC_Os08g27840.2	0	100	osa:4345387	4.1.1.31	-3.42	-1.28	-1.54	640	60	2217	915	3804	1308	phosphoenolpyruvate carboxylase, putative, expressed	AT1G53310.1	ATPEPC1,ATPPC1,PEPC1,PPC1	phosphoenolpyruvate carboxylase 1	PF00311
LOC_Os12g19470.1	3e-86	100	osa:4352016	4.1.1.39	-3.14	-0.06	-1.01	668	76	7487	7194	9364	4655	ribulose bisphosphate carboxylase small chain, chloroplast precursor, putative, expressed	AT1G67090.1	RBCS1A	ribulose bisphosphate carboxylase small chain 1A	PF00101
LOC_Os12g19470.2	5e-106	100	osa:4352021	4.1.1.39	-3.17	-0.06	-1.02	769	86	8454	8136	10949	5385	ribulose bisphosphate carboxylase small chain, chloroplast precursor, putative, expressed	AT1G67090.1	RBCS1A	ribulose bisphosphate carboxylase small chain 1A	PF00101,PF12338
LOC_Os12g19381.1	6e-93	97.06	osa:4352014	4.1.1.39	-3.33	-0.51	-1.29	1610	161	19772	13854	24314	9914	ribulose bisphosphate carboxylase small chain, chloroplast precursor, putative, expressed	AT1G67090.1	RBCS1A	ribulose bisphosphate carboxylase small chain 1A	PF00101,PF12338
LOC_Os12g17600.1	5e-111	100	osa:4351966	4.1.1.39	-3.15	-0.71	-1.72	1146	129	15668	9575	21696	6606	ribulose bisphosphate carboxylase small chain, chloroplast precursor, putative, expressed	AT1G67090.1	RBCS1A	ribulose bisphosphate carboxylase small chain 1A	PF00101,PF12338
LOC_Os12g17600.2	3e-84	84.39	osa:4351966	4.1.1.39	-2.93	-0.72	-1.78	661	87	9462	5757	13855	4039	ribulose bisphosphate carboxylase small chain, chloroplast precursor, putative, expressed	AT1G67090.1	RBCS1A	ribulose bisphosphate carboxylase small chain 1A	PF12338,PF00101
LOC_Os10g13700.2	0	100	osa:4348268	4.1.1.49	7.28	5.84	6.45	221	34272	148	8463	118	10343	phosphoenolpyruvate carboxykinase, putative, expressed	AT4G37870.1	PCK1,PEPCK	phosphoenolpyruvate carboxykinase 1	PF01293	PTHR11699,PTHR11699:SF22
LOC_Os03g15050.4	0	98.66	osa:4332293	4.1.1.49	-1.05	-0.57	1.52	1502	724	2593	1742	3353	9594	phosphoenolpyruvate carboxykinase, putative, expressed	AT4G37870.1	PCK1,PEPCK	phosphoenolpyruvate carboxykinase 1	PF01293
LOC_Os03g15050.2	0	100	osa:4332293	4.1.1.49	-1.04	-0.66	1.5	1994	969	3505	2222	4131	11700	phosphoenolpyruvate carboxykinase, putative, expressed	AT4G37870.1	PCK1,PEPCK	phosphoenolpyruvate carboxykinase 1	PF01293	PTHR11699,PTHR11699:SF22
LOC_Os03g15050.1	0	95.65	osa:4332293	4.1.1.49	-1.04	-0.68	1.5	1904	926	3366	2096	3886	10989	phosphoenolpyruvate carboxykinase, putative, expressed	AT4G37870.1	PCK1,PEPCK	phosphoenolpyruvate carboxykinase 1	PF01293	PTHR11699,PTHR11699:SF22
LOC_Os01g67860.1	0	100	osa:4325027	4.1.2.13	1.65	1.48	1.51	18950	59610	4345	12135	2173	6199	fructose-bisphospate aldolase isozyme, putative, expressed	AT2G36460.1		Aldolase superfamily protein	PF00274	PTHR11627	KOG1557
LOC_Os10g08022.1	0	94.69	osa:4338737	4.1.2.13	1.63	1.45	1.2	5460	16862	1556	4258	666	1534	fructose-bisphospate aldolase isozyme, putative, expressed	AT2G36460.1		Aldolase superfamily protein	PF00274	PTHR11627	KOG1557
LOC_Os05g33380.1	0	100	osa:4338737	4.1.2.13	1.59	1.37	1.12	10436	31326	3180	8203	1297	2827	fructose-bisphospate aldolase isozyme, putative, expressed	AT2G36460.1		Aldolase superfamily protein	PF00274	PTHR11627	KOG1557
LOC_Os06g40640.1	0	98.06	osa:4341496	4.1.2.13	0.34	0.62	-1.26	395	500	2437	3742	7639	3185	fructose-bisphospate aldolase isozyme, putative, expressed	AT4G26530.1		Aldolase superfamily protein	PF00274	PTHR11627	KOG1557
LOC_Os06g40640.3	0	100	osa:4341496	4.1.2.13	0.39	0.63	-1.3	360	473	2315	3593	7476	3042	fructose-bisphospate aldolase isozyme, putative, expressed	AT4G26530.1		Aldolase superfamily protein	PF00274	PTHR11627	KOG1557
LOC_Os06g40640.4	0	92.51	osa:4341496	4.1.2.13	0.39	0.63	-1.3	354	463	2272	3513	7278	2963	fructose-bisphospate aldolase isozyme, putative, expressed	AT4G26530.1		Aldolase superfamily protein	PF00274	PTHR11627
LOC_Os06g40640.2	0	100	osa:4341496	4.1.2.13	0.39	0.63	-1.3	363	477	2351	3641	7591	3075	fructose-bisphospate aldolase isozyme, putative, expressed	AT4G26530.1		Aldolase superfamily protein	PF00274	PTHR11627	KOG1557
LOC_Os11g07020.4	3e-163	79.72	osa:4326074	4.1.2.13	-0.83	-0.22	-1.53	2493	1407	25720	22032	79874	27571	fructose-bisphospate aldolase isozyme, putative, expressed	AT2G21330.1	FBA1	fructose-bisphosphate aldolase 1	PF00274	PTHR11627
LOC_Os11g07020.7	0	99.6	osa:4349897	4.1.2.13	-0.84	-0.22	-1.53	2511	1404	25990	22278	80653	27850	fructose-bisphospate aldolase isozyme, putative, expressed	AT4G38970.1	FBA2	fructose-bisphosphate aldolase 2	PF00274	PTHR11627
LOC_Os11g07020.1	0	100	osa:4349897	4.1.2.13	-0.84	-0.23	-1.54	2590	1448	27099	23169	84427	29049	fructose-bisphospate aldolase isozyme, putative, expressed	AT4G38970.1	FBA2	fructose-bisphosphate aldolase 2	PF00274	PTHR11627	KOG1557
LOC_Os11g07020.5	0	100	osa:4349897	4.1.2.13	-0.86	-0.23	-1.54	2482	1367	25813	22043	80250	27601	fructose-bisphospate aldolase isozyme, putative, expressed	AT4G38970.1	FBA2	fructose-bisphosphate aldolase 2	PF00274	PTHR11627
LOC_Os11g07020.6	1e-104	100	osa:4349897	4.1.2.13	-0.82	-0.35	-1.57	1007	571	11832	9303	36344	12244	fructose-bisphospate aldolase isozyme, putative, expressed	AT4G38970.1	FBA2	fructose-bisphosphate aldolase 2	PF00274	PTHR11627
LOC_Os12g07210.1	4e-125	68.81	osa:4349897	4.1.2.13	-1.91	-0.55	-1.65	276	74	1721	1178	5777	1835
LOC_Os09g36450.2	6e-150	100	osa:4347691	5.3.1.1	-0.99	-0.06	-2.21	699	352	1715	1645	3850	832	triosephosphate isomerase, chloroplast precursor, putative, expressed	AT2G21170.1	PDTPI,TIM	triosephosphate isomerase	PF00121	PTHR21139
LOC_Os09g36450.1	0	100	osa:4347691	5.3.1.1	-0.99	-0.06	-2.21	701	353	1717	1647	3852	834	triosephosphate isomerase, chloroplast precursor, putative, expressed	AT2G21170.1	PDTPI,TIM	triosephosphate isomerase	PF00121	PTHR21139	KOG1643
LOC_Os07g08030.1	7e-171	100	osa:4342543	5.3.1.6	-1.26	-0.21	-2.29	221	92	836	724	2243	460	ribose-5-phosphate isomerase A, putative, expressed	AT3G04790.1		Ribose 5-phosphate isomerase, type A protein	PF06026	PTHR11934	KOG3075
